# Supplementary material for: Stairway to Heaven: Evaluating Levels of Biological Organization Correlated with the Successful Ascent of Natural Waterfalls in the Hawaiian Stream Goby Sicyopterus stimpsoni
Source: PLoS One. 2013 Dec 27;8(12):e84851. doi: 10.1371/journal.pone.0084851 (PMC3873996; doi:10.1371/journal.pone.0084851)
Supplement: Materials and Methods S1 — Detailed proteomics methods. (DOCX) [file pone.0084851.s001.docx]

**SUPPORTING INFORMATION – S1**

**Stairway to Heaven: Evaluating Levels of Biological Organization Correlated with the Successful Ascent of Natural Waterfalls in the Hawaiian Stream Goby *Sicyopterus stimpsoni***

Heiko L. Schoenfuss1*, Takashi Maie2, Kristine N. Moody2, Kelsey E. Lesteberg1, Richard W. Blob2, and Tonya C. Schoenfuss3

1Aquatic Toxicology Laboratory, Saint Cloud State University, Saint Cloud, Minnesota, USA

2Department of Biological Sciences, Clemson University, Clemson, South Carolina, USA

3Department of Food Science and Nutrition, University of Minnesota, Saint Paul, Minnesota, USA

**Materials & Methods**

Detailed Proteomics Methods

Excised muscle tissue was quickly frozen with either liquid nitrogen or dry-ice, then immersed in lysis solution (8M urea, 0.2% SDS, 0.5M TEAB and 4 mM TCEP) at a concentration of 30 μL 246 solution/mg tissue (N=2 fish from each of the four field sites in 2012, and N=2 fish each from Nanue 1 and Nanue 4 from collections during 2013, for a total sample of: Nanue 1, *N*=4; Nanue 2, *N*=2; Nanue 3, *N*=2; Nanue 4, *N*=4). Tissue was homogenized in the buffer by either sonication or with a glass mortar and Teflon pestle, and frozen for shipping. Samples were stored at -80°C. Fish muscle extracts were shipped frozen to Bioproximity, LLC (Chantilly, VA) for sample digestion and proteomic analysis.

*FASP Method*. Samples were brought to 2% SDS, 50 mM Tris-HCl, pH 7.6, 10 mM DTT and heated at 95°C for 10 min. Samples were transferred to a 30 k Amicon molecular weight cut-off device (Millipore, Billerica, MA) and centrifuged at 13 k g for 30 min. The remaining sample was buffer exchanged with 6 M urea, 100 mM Tris-HCl, pH 7.6, then alkylated with 55 mM iodoacetamide. Concentrations were measured using a Qubit fluorometer (Invitrogen, Grand Island, NY). Trypsin was added at a 1:40 enzyme to substrate ratio and the sample incubated overnight on a heat block at 37°C. The device was centrifuged and the filtrate collected.

*Peptide Desalting and Fractionation*. Digested peptides were desalted using C18 Stage micropipette tips. Briefly, for each sample a C18 Stage tip was activated with methanol, and then conditioned with 60% acetonitrile with 0.5% acetic acid followed by 5% acetonitrile with 0.5% acetic acid. Samples were loaded onto the tips and desalted with 0.5% acetic acid. Peptides were eluted with 60% acetonitrile, 0.5% acetic acid and lyophilized in a SpeedVac (Thermo Savant, Thermo Fisher Scientific, Waltham, MA) to dryness, approximately 2 hrs. Peptides were fractionated by dissolving samples in Britton-Robinson buffer pH 10 and loaded on to C18 Stage tips. Flow-through was collected. Subsequent fractions were taken by eluting peptides with Britton Robinson buffers at pH 8, 6, 5, 4 and 3.2 and capturing with C18 Stage tips. Peptides were eluted from the C18 Stage tips and dried as described above.

*Liquid Chromatography-Tandem Mass Spectrometry*. Each reaction mixture was analyzed by LC-MS/MS. LC was performed on an Easy nanoLC II HPLC system (Thermo Fisher). Mobile phase A was 94.5% MilliQ water, 5% acetonitrile, 0.5% acetic acid. Mobile phase B was 80% acetonitrile, 19.5% MilliQ water, 0.5% acetic acid. The 120 min LC gradient ran from 2% B to 35% B over 100 min, with the remaining time used for sample loading and column regeneration. Samples were loaded to a 2 cm x 100 um I.D. trap column positioned on a Rheodyne actuated valve (IDEX Health and Science, Oak Harbor, WA). The column was 13 cm x 100 um I.D. fused silica with a pulled tip emitter. Both trap and analytical columns were packed with 3.5 um C18 resin (Zorbax SB, Agilent, Santa Clara, CA). The LC was interfaced to a dual pressure linear ion trap mass spectrometer (LTQ Velos, Thermo Fisher) via nano-electrospray ionization. An electrospray voltage of 1.8 kV was applied to a pre-column tee. The mass spectrometer was programmed to acquire, by data-dependent acquisition, tandem mass spectra from the top 15 ions in the full scan from 400 - 1400 m/z. Dynamic exclusion was set to 30 s.

*Mass Spec Data Analyis*. Mass spectrometer RAW data files were converted to MGF format using msconvert. Briefly, all searches required strict tryptic cleavage, 0 or 1 missed cleavages, fixed modification of cysteine alkylation, variable modification of methionine oxidation and expectation value scores of 0.01 or lower. MGF files were searched using X!Hunter (http://www.thegpm.org/TANDEM/index.html) against the latest library available at the time on The Global Proteome Machine (GPM) (http://www.thegpm.org). Other searches used the cRAP (http://www.thegpm.org/crap/index.html) contaminant library from GPM and libraries constructed from the latest Ensembl release available at the time (http://www.ensembl.org/index.html). MGF files were searched using X!!Tandem (http://wiki.thegpm.org/wiki/X!!Tandem) using both the native and k-score scoring algorithms and by Open Mass Spectrometry Search Algorithm (OMSSA) (http://pubchem.ncbi.nlm.nih.gov/omssa/). All searches were performed on Amazon Web Services-based cluster compute instances using the Proteome Cluster Interface (http://www.bioproximity.com/proteome-cluster.html). XML output files were parsed and non-redundant protein sets determined using MassSieve (http://www.ncbi.nlm.nih.gov/staff/slottad/MassSieve/). Proteins were required to have 2 or more unique peptides across the analyzed samples with E-value scores of 0.01 or less, 0.001 for X!Hunter and protein E-value scores of 0.0001 or less. We considered differences to be significant if log2 of the ratio between Nanue 1 and 4 was ≥ 2 or ≤ -2 in both sampling years.
